# Supplementary material for: Rapid and simple SNP genotyping for Bordetella pertussis epidemic strain MT27 based on a multiplexed single-base extension assay
Source: Research Square preprint supplement (doi:10.21203/rs.3.rs-109399/v1), 2020-11-25
Supplement: Supplementary file 1 [file d540e92f4e89c6f14453036e.xlsx]

## Sheet: Table S1
Table S1. Japanese Bordetella pertussis MT27 isolates used in this study.
Isolate	Isolation year	Patient age*	Origin (District)	SNP genotype	Virulence-associated allelic genes				Outbreak isolate (Prefecture)	WGS analysis (Reference)
					ptxP	ptxA	prn	fim3
BP31	1999	unknown	Kanto	SG1	3	1	2	A		17
BP60	2000	2M	Kanto	SG1	3	1	2	A		17
BP67	2000	1Y	Kinki	SG1	3	1	2	A		17
BP102	1999	unknown	Kanto	SG1	3	1	2	A
BP103	1999	unknown	Kanto	SG1	3	1	2	A		17
BP108	2000	unknown	Kanto	SG1	3	1	2	A		17
BP113	2000	unknown	Kanto	SG1	3	1	2	A		17
BP134	2000	6M	Tohoku	SG1	3	1	2	A		17
BP135	2000	6M	Tohoku	SG1	3	1	2	A		17
BP139	2001	3M	Kanto	SG1	3	1	2	A		17
BP145	2002	1Y	Hokkaido	SG1	1	1	15	A
BP159	2002	4M	Chugoku	SG1	3	1	2	A		17
BP162	2002	1M	Kyushu	SG1	3	1	2	A		17
BP199	2003	3M	Kanto	SG1	3	1	2	A
BP205	2003	7M	Kyushu	SG1	3	1	2	A
BP206	2003	6Y	Kyushu	SG1	3	1	2	A
BP207	2003	10M	Tohoku	SG1	3	1	2	A
BP208	2003	7M	Kyushu	SG1	3	1	2	A
BP212	2003	1Y	Kanto	SG1	3	1	2	B
BP213	2003	4Y	Kanto	SG1	3	1	2	A
BP218	2003	5Y	Kanto	SG1	3	1	2	A
BP220	2003	8M	Kanto	SG1	3	1	2	A
BP221	2003	6M	Kanto	SG1	3	1	2	A
BP222	2003	5Y	Kanto	SG1	3	1	2	A
BP225	2003	7M	Kyushu	SG1	3	1	2	A
BP226	2003	2M	Tohoku	SG1	3	1	2	A
BP228	2003	1Ｍ	Kanto	SG1	3	1	2	A
BP229	2003	8Ｍ	Kyushu	SG1	3	1	2	A
BP231	2004	7M	Tohoku	SG1	3	1	2	A
BP235	2004	8M	Tohoku	SG1	3	1	2	A		17
BP240	2003	1Y	Kanto	SG1	3	1	2	A
BP260	2004	1Y	Kanto	SG1	3	1	2	A		17
BP262	2004	3M	Kyushu	SG1	3	1	2	A
BP266	2004	unknown	Kyushu	SG1	3	1	2	A
BP271	2004	2M	Kinki	SG1	3	1	2	A
BP272	2004	1M	Chugoku	SG1	3	1	2	A
BP274	2004	7M	Kyushu	SG1	3	1	2	A
BP275	2004	2Y	Kyushu	SG1	3	1	2	A
BP282	2004	6M	Kanto	SG1	3	1	2	A
BP283	2005	9Y	Kanto	SG1	3	1	2	A
BP289	2005	6M	Kinki	SG1	3	1	2	A
BP290	2005	1Y	Chugoku	SG1	3	1	2	A		17
BP294	2005	10M	Kyushu	SG2	3	1	2	A
BP296	2005	6Y	Kyushu	SG1	3	1	2	A
BP301	2005	11M	Kyushu	SG1	3	1	2	B
BP312	2007	4M	Kanto	SG1	3	1	2	A
BP324	2007	65Y	Kanto	SG1	3	1	2	A
BP330	2007	6M	Chubu	SG1	3	1	2	B		17
BP331	2008	1Y	Chubu	SG1	3	1	2	B
BP336	2007	0Y	Kinki	SG1	3	1	2	A
BP337	2007	43Y	Kinki	SG1	3	1	2	A
BP338	2008	11Y	Kinki	SG1	3	1	2	B		17
BP339	2008	8Y	Kinki	SG1	3	1	2	B
BP340	2008	29Y	Kinki	SG1	3	1	2	B
BP342	2008	0Y	Kinki	SG1	3	1	2	B
BP344	2008	5Y	Chubu	SG1	3	1	2	B		17
BP345	2008	4Y	Chubu	SG1	3	1	2	B
BP347	2009	3Y	Shikoku	SG1	3	1	9	A		17
BP348	2009	41Y	Chubu	SG7	3	1	2	A		17
BP355	2009	6M	Kinki	SG1	3	1	2	A
BP362	2010	3Y	Kyushu	SG1	3	1	2	B
BP364	2010	8Y	Kanto	SG7	3	1	2	A		17
BP367	2010	9Y	Kyushu	SG2	3	1	2	A		17
BP369	2010	15Y	Kyushu	SG2	3	1	2	A	Miyazaki
BP370	2010	15Y	Kyushu	SG2	3	1	2	A	Miyazaki
BP372	2010	14Y	Kyushu	SG2	3	1	2	A	Miyazaki
BP373	2010	14Y	Kyushu	SG2	3	1	2	A	Miyazaki
BP374	2010	13Y	Kyushu	SG2	3	1	2	A	Miyazaki
BP375	2010	12Y	Kyushu	SG2	3	1	2	A	Miyazaki
BP376	2011	2M	Chubu	SG10	3	1	2	A		This study
BP377	2011	1Y	Chugoku	SG2	3	1	2	A		This study
BP379	2011	14Y	Kyushu	SG2	3	1	2	A	Miyazaki	This study
BP380	2011	11Y	Kyushu	SG2	3	1	2	A	Miyazaki
BP381	2011	13Y	Kyushu	SG2	3	1	2	A	Miyazaki
BP382	2011	8Y	Kyushu	SG2	3	1	2	A	Miyazaki
BP383	2011	12Y	Kyushu	SG2	3	1	2	A	Miyazaki
BP384	2011	10Y	Kyushu	SG2	3	1	2	A	Miyazaki
BP385	2011	62Y	Kyushu	SG2	3	1	2	A	Miyazaki
BP386	2011	12Y	Kyushu	SG2	3	1	2	A	Miyazaki
BP387	2011	12Y	Kyushu	SG2	3	1	2	A	Miyazaki
BP388	2011	3Y	Kyushu	SG2	3	1	2	A
BP389	2011	3M	Kanto	SG7	3	1	2	A
BP391	2011	5Y	Kanto	SG7	3	1	2	A
BP392	2011	4M	Kanto	SG7	3	1	2	A
BP393	2011	11M	Kyushu	SG6	3	1	2	A
BP394	2011	5M	Kyushu	SG6	3	1	2	A
BP399	2011	2Y	Kinki	SG6	3	1	2	A		17
BP402	2011	1M	Kinki	SG6	3	1	2	A
BP404	2011	10Y	Kyushu	SG2	3	1	2	A		This study
BP405	2011	14Y	Kyushu	SG1	3	1	2	A
BP406	2011	1M	Kyushu	SG2	3	1	2	A
BP407	2011	6M	Kyushu	SG2	3	1	2	A
BP408	2012	5M	Kanto	SG5	3	1	2	A
BP409	2012	4M	Tohoku	SG7	3	1	2	A		This study
BP411	2012	17Y	Tohoku	SG7	3	1	2	A
BP413	2012	10Y	Kanto	SG6	3	1	2	A		This study
BP414	2012	1M	Chubu	SG7	3	1	2	A		This study
BP415	2012	8Y	Kanto	SG7	3	1	2	A
BP419	2012	2M	Kanto	SG7	3	1	2	A
BP420	2012	4M	Kanto	SG1	3	1	2	A		This study
BP421	2012	5M	Kanto	SG1	3	1	2	B
BP422	2012	8Y	Kanto	SG7	3	1	2	A
BP423	2012	8Y	Kanto	SG7	3	1	2	A
BP424	2012	9Y	Kanto	SG7	3	1	2	A
BP425	2012	7Y	Kanto	SG7	3	1	2	A
BP426	2012	8Y	Kanto	SG7	3	1	2	A
BP427	2012	4Y	Kanto	SG7	3	1	2	A
BP428	2012	10Y	Kanto	SG7	3	1	2	A
BP429	2012	12Y	Kanto	SG7	3	1	2	A
BP430	2011	1Y	Kinki	SG6	3	1	2	A		This study
BP431	2011	2M	Kinki	SG1	3	1	9	B
BP432	2011	8Y	Kinki	SG10	3	1	2	A
BP433	2011	5M	Kinki	SG10	3	1	2	A
BP434	2012	7Y	Kanto	SG7	3	1	2	A
BP435	2012	7Y	Kanto	SG7	3	1	2	A
BP436	2011	4M	Kinki	SG6	3	1	2	A
BP439	2012	3M	Kinki	SG1	3	1	2	A
BP443	2012	3M	Kinki	SG10	3	1	2	A		This study
BP444	2012	1M	Tohoku	SG7	3	1	3	A
BP445	2012	1M	Tohoku	SG10	3	1	2	A		This study
BP446	2012	2M	Tohoku	SG10	3	1	2	A
BP448	2012	2M	Kinki	SG10	3	1	2	A
BP449	2012	4M	Kinki	SG10	3	1	2	A
BP450	2012	1M	Kinki	SG8	3	1	2	A
BP454	2012	11Y	Tohoku	SG1	3	1	9	B		17
BP455	2012	1M	Tohoku	SG10	3	1	2	A
BP456	2012	0M	Tohoku	SG7	3	1	2	A
BP462	2010	6M	Kanto	SG1	3	1	2	A		17
BP463	2011	3M	Kanto	SG1	3	1	2	A
BP464	2008	3M	Kanto	SG1	3	1	2	A
BP465	2008	27Y	Kanto	SG1	3	1	2	B
BP467	2008	8M	Kanto	SG1	3	1	2	B
BP470	2010	1M	Kanto	SG1	3	1	2	A
BP471	2011	2M	Kanto	SG1	3	1	2	A
BP472	2012	1M	Kanto	SG4	3	1	2	A
BP473	2013	29Y	Shikoku	SG10	3	1	2	A		17
BP477	2012	2M	Kinki	SG5	3	1	2	A
BP479	2013	10Y	Kinki	SG6	3	1	2	A		17
BP482	2013	4M	Kanto	SG5	3	1	2	A		17
BP483	2013	52Y	Kyushu	SG2	3	1	2	A
BP485	2014	13Y	Kyushu	SG8	3	1	2	A
BP486	2014	1M	Shikoku	SG10	3	1	2	A		17
BP487	2014	1M	Kanto	SG10	3	1	2	A
BP488	2014	1M	Chugoku	SG10	3	1	2	A
BP489	2014	5Y	Kyushu	SG10	3	1	2	A
BP490	2014	3M	Chugoku	SG1	3	1	2	B		17
BP491	2014	8Y	Kinki	SG8	3	1	2	A
BP492	2014	5Y	Kinki	SG8	3	1	2	A
BP493	2011	unknown	Kanto	SG1	3	1	2	B
BP494	2011	0Y	Kanto	SG1	3	1	2	A
BP495	2012	0Y	Tohoku	SG7	3	1	2	A
BP496	2012	unknown	Kanto	SG10	3	1	2	A
BP497	2013	3M	Kanto	SG7	3	1	2	A
BP498	2013	5Y	Tohoku	SG7	3	1	2	A
BP499	2014	3M	Kinki	SG6	3	1	2	A
BP500	2014	30Y	Kyushu	SG7	3	1	2	A
BP501	2011	unknown	Kinki	SG5	3	1	2	A
BP502	2014	1M	Kanto	SG7	3	1	2	A		17
BP503	2014	1M	Kanto	SG10	3	1	2	A
BP504	2014	1M	Kinki	SG7	3	1	2	A		17
BP505	2014	36Y	Kinki	SG7	3	1	2	A
BP506	2014	10Y	Hokkaido	SG10	3	1	2	A
BP508	2015	1M	Chubu	SG7	3	1	2	A
BP512	2015	8Y	Kinki	SG8	3	1	2	A
BP513	2012	3M	Kyushu	SG6	3	1	2	A
BP514	2012	4M	Kyushu	SG2	3	1	2	A
BP516	2013	2M	Kyushu	SG6	3	1	2	A
BP517	2014	1M	Kyushu	SG1	3	1	2	A
BP518	2014	1M	Kyushu	SG5	3	1	2	A
BP519	2014	8Y	Kyushu	SG5	3	1	2	A
BP520	2014	13Y	Kyushu	SG1	3	1	2	A
BP521	2014	6Y	Kyushu	SG10	3	1	2	A
BP522	2014	6Y	Kyushu	SG1	3	1	2	A
BP523	2014	8Y	Kyushu	SG5	3	1	2	A
BP524	2014	4M	Kyushu	SG6	3	1	2	A
BP525	2014	1M	Kyushu	SG2	3	1	2	A
BP526	2014	2M	Kyushu	SG9	3	1	2	A
BP528	2015	1M	Kyushu	SG1	3	1	2	A
BP529	2015	2M	Kyushu	SG10	3	1	2	A
BP530	2015	3M	Kyushu	SG10	3	1	2	A
BP531	2015	3M	Kyushu	SG8	3	1	2	A
BP532	2014	4M	Kyushu	SG1	3	1	2	A
BP533	2015	1M	Kinki	SG1	3	1	2	A
BP534	2015	0M	Kyushu	SG7	3	1	2	A
BP536	2015	3M	Shikoku	SG7	3	1	2	A
BP538	2012	0M	Tohoku	SG7	3	1	2	A
BP540	2015	1M	Tohoku	SG7	3	1	2	A
BP541	2015	6M	Kinki	SG8	3	1	2	A
BP542	2016	9Y	Hokkaido	SG8	3	1	2	A		This study
BP543	2016	10Y	Kinki	SG1	3	1	2	B
BP545	2016	13Y	Chubu	SG7	3	1	2	A	Nagano	This study
BP546	2016	13Y	Chubu	SG7	3	1	2	A	Nagano
BP547	2016	11Y	Chubu	SG7	3	1	2	A	Nagano
BP548	2016	12Y	Chubu	SG7	3	1	2	A	Nagano
BP549	2016	9Y	Hokkaido	SG7	3	1	2	A
BP551	2015	12Y	Chubu	SG10	3	1	2	A	Toyama	This study
BP552	2015	13Y	Chubu	SG10	3	1	2	A	Toyama
BP553	2016	7Y	Chubu	SG10	3	1	2	A	Toyama
BP554	2016	11Y	Chubu	SG10	3	1	2	A	Toyama
BP556	2016	8Y	Kanto	SG7	3	1	2	A		This study
BP557	2016	15Y	Chubu	SG7	3	1	2	A	Nagano
BP558	2016	9Y	Chubu	SG7	3	1	2	A	Nagano
BP559	2016	8Y	Chubu	SG7	3	1	2	A	Nagano
BP560	2016	9Y	Chubu	SG7	3	1	2	A	Nagano
BP561	2016	6Y	Chubu	SG5	3	1	2	A	Nagano
BP562	2016	8Y	Kanto	SG7	3	1	2	A
BP563	2016	3Y	Kinki	SG5	3	1	2	A		This study
BP564	2016	10Y	Kinki	SG5	3	1	2	A
BP565	2016	9Y	Kinki	SG5	3	1	2	A
BP566	2016	14Y	Chubu	SG7	3	1	2	A	Nagano
BP567	2016	54Y	Chubu	SG7	3	1	2	A	Nagano
BP568	2016	2Y	Kinki	SG10	3	1	2	A
BP569	2016	9Y	Kinki	SG5	3	1	2	A
BP570	2016	6Y	Kinki	SG5	3	1	2	A
BP571	2016	8Y	Kinki	SG5	3	1	2	A
BP572	2016	1M	Chugoku	SG1	3	1	2	B
BP573	2016	14Y	Chubu	SG7	3	1	2	A	Nagano
BP574	2016	12Y	Kinki	SG5	3	1	2	A
BP575	2016	1M	Hokkaido	SG8	3	1	2	A		This study
BP576	2016	1M	Kanto	SG5	3	1	2	A		This study
BP577	2017	0M	Kanto	SG7	3	1	2	A		This study
BP578	2010	1M	Kanto	SG1	3	1	2	B
BP579	2015	47Y	Kanto	SG10	3	1	2	A
BP580	2015	4M	Kanto	SG5	3	1	2	A		This study
BP581	2016	2M	Chubu	SG7	3	1	2	A
BP582	2016	3M	Chubu	SG8	3	1	2	A
BP583	2016	2M	Kanto	SG8	3	1	2	A
BP584	2017	3M	Kanto	SG8	3	1	2	A
BP585	2017	9Y	Kanto	SG7	3	1	14	A
BP586	2018	10Y	Chubu	SG10	3	1	9	A	Niigata
BP587	2018	15Y	Chubu	SG10	3	1	9	A	Niigata
BP588	2018	14Y	Chubu	SG10	3	1	9	A	Niigata
BP589	2018	14Y	Chubu	SG10	3	1	9	A	Niigata
BP591	2018	13Y	Kanto	SG7	3	1	2	A
BP592	2018	7Y	Kanto	SG8	3	1	2	A
BP597	2018	14Y	Kanto	SG7	3	1	2	A
BP598	2018	1M	Kanto	SG3	3	1	2	A
*M, month; Y, year

## Sheet: Table S2
Table S2. 20-position SNP profiles of 51 Japanese Bordetella pertussis MT27 isolates, based on whole-genome sequnecing.
Isolate	Isolation year	Allelic gene profile	SNP genotype	Position and SNP name*																				WGS data (accession number)
				SNP2	SNP8	SNP11	SNP12	SNP14	SNP15	SNP16	SNP17	SNP18	SNP19	SNP20	SNP22	SNP24	SNP25	SNP26	SNP28	SNP30	SNP31	SNP32	SNP34
				62982	870614	980942	1182054	1459272	1470281	1692984	1806441	1824667	1845571	1890117	2308009	2395350	2436106	2657330	2884401	3326160	3436938	3523618	3758827
Tohama	1952	ptxP1/ptxA2/prn1/fim3A	SG1	C	G	A	A	A	C	C	G	C	C	C	G	G	C	A	T	G	C	C	G	NC_002929.2 (Reference seq.)
BP31	1999	ptxP3/ptxA1/prn2/fim3A	SG1	C	G	A	A	A	C	C	G	C	C	C	G	G	C	A	T	G	C	C	G	ERX1840190
BP60	2000	ptxP3/ptxA1/prn2/fim3A	SG1	C	G	A	A	A	C	C	G	C	C	C	G	G	C	A	T	G	C	C	G	ERX1840250
BP67	2000	ptxP3/ptxA1/prn2/fim3A	SG1	C	G	A	A	A	C	C	G	C	C	C	G	G	C	A	T	G	C	C	G	ERX1840255
BP103	1999	ptxP3/ptxA1/prn2/fim3A	SG1	C	G	A	A	A	C	C	G	C	C	C	G	G	C	A	T	G	C	C	G	ERX1840131
BP108	2000	ptxP3/ptxA1/prn2/fim3A	SG1	C	G	A	A	A	C	C	G	C	C	C	G	G	C	A	T	G	C	C	G	ERX1840135
BP113	2000	ptxP3/ptxA1/prn2/fim3A	SG1	C	G	A	A	A	C	C	G	C	C	C	G	G	C	A	T	G	C	C	G	ERX1840138
BP134	2000	ptxP3/ptxA1/prn2/fim3A	SG1	C	G	A	A	A	C	C	G	C	C	C	G	G	C	A	T	G	C	C	G	ERX1840157
BP135	2000	ptxP3/ptxA1/prn2/fim3A	SG1	C	G	A	A	A	C	C	G	C	C	C	G	G	C	A	T	G	C	C	G	ERX1840158
BP139	2001	ptxP3/ptxA1/prn2/fim3A	SG1	C	G	A	A	A	C	C	G	C	C	C	G	G	C	A	T	G	C	C	G	ERX1840159
BP159	2002	ptxP3/ptxA1/prn2/fim3A	SG1	C	G	A	A	A	C	C	G	C	C	C	G	G	C	A	T	G	C	C	G	ERX1840164
BP162	2002	ptxP3/ptxA1/prn2/fim3A	SG1	C	G	A	A	A	C	C	G	C	C	C	G	G	C	A	T	G	C	C	G	ERX1840165
BP235	2004	ptxP3/ptxA1/prn2/fim3A	SG1	C	G	A	A	A	C	C	G	C	C	C	G	G	C	A	T	G	C	C	G	ERX1840176
BP260	2004	ptxP3/ptxA1/prn2/fim3A	SG1	C	G	A	A	A	C	C	G	C	C	C	G	G	C	A	T	G	C	C	G	ERX1840178
BP290	2005	ptxP3/ptxA1/prn2/fim3A	SG1	C	G	A	A	A	C	C	G	C	C	C	G	G	C	A	T	G	C	C	G	ERX1840183
BP330	2007	ptxP3/ptxA1/prn2/fim3B	SG1	C	G	A	A	A	C	C	G	C	C	C	G	G	C	A	T	G	C	C	G	ERX1840199
BP338	2008	ptxP3/ptxA1/prn2/fim3B	SG1	C	G	A	A	A	C	C	G	C	C	C	G	G	C	A	T	G	C	C	G	ERX1840200
BP344	2008	ptxP3/ptxA1/prn2/fim3B	SG1	C	G	A	A	A	C	C	G	C	C	C	G	G	C	A	T	G	C	C	G	ERX1840204
BP347	2009	ptxP3/ptxA1/prn9/fim3A	SG1	C	G	A	A	A	C	C	G	C	C	C	G	G	C	A	T	G	C	C	G	ERX1840206
BP348	2009	ptxP3/ptxA1/prn2/fim3A	SG7	C	G	A	A	A	T	T	G	T	C	C	G	G	C	C	T	A	T	T	G	ERX1840207
BP364	2010	ptxP3/ptxA1/prn2/fim3A	SG7	C	G	A	A	A	T	T	G	T	C	C	G	G	C	C	T	A	T	T	G	ERX1840214
BP367	2010	ptxP3/ptxA1/prn2/fim3A	SG2	T	T	G	A	A	C	C	G	C	T	T	G	G	C	A	T	G	C	C	A	ERX1840215
BP376	2011	ptxP3/ptxA1/prn2/fim3A	SG10	C	G	A	G	A	T	T	G	T	C	C	G	A	C	C	T	G	T	T	G	DRX155795
BP377	2011	ptxP3/ptxA1/prn2/fim3A	SG2	T	T	G	A	A	C	C	G	C	T	T	G	G	C	A	T	G	C	C	A	DRX155796
BP379	2011	ptxP3/ptxA1/prn2/fim3A	SG2	T	T	G	A	A	C	C	G	C	T	T	G	G	C	A	T	G	C	C	A	DRX155797
BP399	2011	ptxP3/ptxA1/prn2/fim3A	SG6	C	G	A	A	A	T	T	A	T	C	C	G	G	C	C	T	A	T	T	G	ERX1840220
BP404	2011	ptxP3/ptxA1/prn2/fim3A	SG2	T	T	G	A	A	C	C	G	C	T	T	G	G	C	A	T	G	C	C	A	DRX155798
BP409	2012	ptxP3/ptxA1/prn2/fim3A	SG7	C	G	A	A	A	T	T	G	T	C	C	G	G	C	C	T	A	T	T	G	DRX155799
BP413	2012	ptxP3/ptxA1/prn2/fim3A	SG6	C	G	A	A	A	T	T	A	T	C	C	G	G	C	C	T	A	T	T	G	DRX155800
BP414	2012	ptxP3/ptxA1/prn2/fim3A	SG7	C	G	A	A	A	T	T	G	T	C	C	G	G	C	C	T	A	T	T	G	DRX155801
BP420	2012	ptxP3/ptxA1/prn2/fim3A	SG1	C	G	A	A	A	C	C	G	C	C	C	G	G	C	A	T	G	C	C	G	DRX155802
BP430	2011	ptxP3/ptxA1/prn2/fim3A	SG6	C	G	A	A	A	T	T	A	T	C	C	G	G	C	C	T	A	T	T	G	DRX155803
BP443	2012	ptxP3/ptxA1/prn2/fim3A	SG10	C	G	A	G	A	T	T	G	T	C	C	G	A	C	C	T	G	T	T	G	DRX155804
BP445	2012	ptxP3/ptxA1/prn2/fim3A	SG10	C	G	A	G	A	T	T	G	T	C	C	G	A	C	C	T	G	T	T	G	DRX155805
BP454	2012	ptxP3/ptxA1/prn9/fim3B	SG1	C	G	A	A	A	C	C	G	C	C	C	G	G	C	A	T	G	C	C	G	ERX1840232
BP462	2010	ptxP3/ptxA1/prn2/fim3A	SG1	C	G	A	A	A	C	C	G	C	C	C	G	G	C	A	T	G	C	C	G	ERX1840233
BP473	2013	ptxP3/ptxA1/prn2/fim3A	SG10	C	G	A	G	A	T	T	G	T	C	C	G	A	C	C	T	G	T	T	G	ERX1840234
BP479	2013	ptxP3/ptxA1/prn2/fim3A	SG6	C	G	A	A	A	T	T	A	T	C	C	G	G	C	C	T	A	T	T	G	ERX1840236
BP482	2013	ptxP3/ptxA1/prn2/fim3A	SG5	C	G	A	A	G	T	C	G	C	C	C	A	G	T	A	C	G	T	T	G	ERX1840238
BP486	2014	ptxP3/ptxA1/prn2/fim3A	SG10	C	G	A	G	A	T	T	G	T	C	C	G	A	C	C	T	G	T	T	G	ERX1840240
BP490	2014	ptxP3/ptxA1/prn2/fim3B	SG1	C	G	A	A	A	C	C	G	C	C	C	G	G	C	A	T	G	C	C	G	ERX1840241
BP502	2014	ptxP3/ptxA1/prn2/fim3A	SG7	C	G	A	A	A	T	T	G	T	C	C	G	G	C	C	T	A	T	T	G	ERX1840243
BP504	2014	ptxP3/ptxA1/prn2/fim3A	SG7	C	G	A	A	A	T	T	G	T	C	C	G	G	C	C	T	A	T	T	G	ERX1840244
BP542	2016	ptxP3/ptxA1/prn2/fim3A	SG8	C	G	A	A	A	T	T	G	T	C	C	G	A	C	C	T	G	T	T	G	DRX155806
BP545	2016	ptxP3/ptxA1/prn2/fim3A	SG7	C	G	A	A	A	T	T	G	T	C	C	G	G	C	C	T	A	T	T	G	DRX155807
BP551	2015	ptxP3/ptxA1/prn2/fim3A	SG10	C	G	A	G	A	T	T	G	T	C	C	G	A	C	C	T	G	T	T	G	DRX155808
BP556	2016	ptxP3/ptxA1/prn2/fim3A	SG7	C	G	A	A	A	T	T	G	T	C	C	G	G	C	C	T	A	T	T	G	DRX155809
BP563	2016	ptxP3/ptxA1/prn2/fim3A	SG5	C	G	A	A	G	T	C	G	C	C	C	A	G	T	A	C	G	T	T	G	DRX155810
BP575	2016	ptxP3/ptxA1/prn2/fim3A	SG8	C	G	A	A	A	T	T	G	T	C	C	G	A	C	C	T	G	T	T	G	DRX155811
BP576	2016	ptxP3/ptxA1/prn2/fim3A	SG5	C	G	A	A	G	T	C	G	C	C	C	A	G	T	A	C	G	T	T	G	DRX155812
BP577	2017	ptxP3/ptxA1/prn2/fim3A	SG7	C	G	A	A	A	T	T	G	T	C	C	G	G	C	C	T	A	T	T	G	DRX155813
BP580	2015	ptxP3/ptxA1/prn2/fim3A	SG5	C	G	A	A	G	T	C	G	C	C	C	A	G	T	A	C	G	T	T	G	DRX155814
*Positions according to the plus strand on the genomic sequence of Bordetella pertussis strain Tohama, NC_002929.2.

## Sheet: Table S3
Table S3. A total of 254 whole-genome SNPs identified among 51 Japanese Bordetella pertussis MT27 isolates.
Isolate	Isolation year	SNP genotype	Position according to the plus strand on the genomic sequence of Bordetella pertussis strain Tohama, NC_002929.2
			4610	25778	32626	36857	52564	62982	73807	106088	170017	185405	202693	212641	223961	224066	237097	271872	273468	276006	289420	291965	307086	345471	372931	377646	407686	417496	447876	455883	499653	515539	515633	517023	531767	532009	536125	539850	586291	593095	599076	626936	629279	635965	649215	667028	684195	688836	694521
20 SNP targets								*
Reference (Tohama)	1952	SG1	C	T	C	A	A	C	G	C	G	G	G	G	G	G	C	G	G	C	T	G	G	C	A	C	C	A	G	G	A	C	T	T	G	C	T	A	T	G	C	C	C	C	G	G	C	C	A
BP31	1999	SG1	C	T	C	A	A	C	G	T	G	G	G	G	G	G	C	G	G	C	T	G	G	C	G	C	C	C	G	G	A	C	T	T	G	C	T	A	T	G	C	C	C	C	G	G	C	C	A
BP60	2000	SG1	C	T	T	G	A	C	G	C	G	A	G	G	G	G	C	G	G	C	T	G	G	C	G	C	C	C	G	G	A	C	T	T	G	T	T	A	T	G	A	C	C	C	G	G	C	C	G
BP67	2000	SG1	C	T	C	G	A	C	G	C	G	A	G	G	G	G	C	G	G	C	T	G	G	C	G	C	C	C	G	G	A	C	C	T	G	C	T	A	T	G	C	C	C	C	G	A	C	C	G
BP103	1999	SG1	C	T	C	A	A	C	G	C	G	G	G	G	G	G	C	G	G	C	T	G	G	C	G	C	C	C	A	G	A	C	T	T	G	C	T	A	T	G	C	C	T	C	G	G	C	C	A
BP108	2000	SG1	C	T	C	G	A	C	G	C	G	A	G	G	G	G	C	G	G	C	T	G	G	C	G	C	C	C	G	G	A	C	C	G	G	C	T	A	T	G	C	C	C	C	G	A	C	C	G
BP113	2000	SG1	C	T	C	G	A	C	G	C	G	A	G	G	G	G	C	G	G	C	T	G	G	C	G	C	C	C	G	G	A	C	T	T	G	C	T	A	T	G	C	C	C	C	G	G	C	C	G
BP134	2000	SG1	C	T	C	G	A	C	G	C	G	A	G	G	G	G	C	G	G	C	T	G	G	C	G	C	C	C	G	G	A	C	T	T	G	C	T	A	T	G	C	C	C	C	G	A	C	T	G
BP135	2000	SG1	C	T	C	A	A	C	G	C	G	G	G	G	G	G	C	G	G	C	T	G	G	C	G	C	C	C	A	G	A	C	T	T	G	C	T	A	T	G	C	C	T	C	G	G	C	C	A
BP139	2001	SG1	C	T	C	G	A	C	G	C	G	A	G	G	G	G	C	G	G	C	T	G	G	C	G	C	C	C	G	G	A	C	T	T	G	C	T	A	T	G	C	C	C	C	G	G	C	C	G
BP159	2002	SG1	C	T	C	G	A	C	G	C	G	A	A	G	G	G	C	G	G	C	T	G	G	C	G	C	C	C	G	G	A	C	T	T	G	C	T	A	T	G	C	C	C	C	G	A	C	C	G
BP162	2002	SG1	C	T	T	G	A	C	G	C	G	A	G	G	G	G	C	G	G	C	T	G	G	C	G	C	C	C	G	G	A	C	T	T	G	T	T	A	T	G	C	C	C	C	G	G	C	C	G
BP235	2004	SG1	C	T	C	G	A	C	G	C	G	A	G	G	G	G	C	G	G	C	T	G	G	C	G	C	C	C	G	G	A	C	T	T	G	C	T	A	T	G	C	C	C	C	G	G	C	C	G
BP260	2004	SG1	C	T	C	A	A	C	G	C	G	G	G	G	G	G	C	G	G	C	T	G	G	C	G	C	C	C	A	G	A	C	T	T	G	C	T	A	T	G	C	C	T	C	G	G	C	C	A
BP290	2005	SG1	C	T	C	G	A	C	G	C	G	A	G	G	G	G	C	G	G	C	T	G	A	C	A	C	C	C	G	G	A	C	T	T	G	C	T	A	T	G	C	C	C	C	G	A	C	C	G
BP330	2007	SG1	C	T	C	G	A	C	G	C	G	A	G	G	G	G	C	G	G	C	T	G	G	C	G	C	C	C	G	G	A	C	T	T	G	C	T	A	T	G	C	C	C	C	G	G	C	C	G
BP338	2008	SG1	C	T	C	G	A	C	G	C	G	A	G	G	G	G	C	G	G	C	T	G	G	C	G	T	C	C	G	G	C	C	T	T	A	C	T	A	T	G	C	C	C	C	G	G	C	C	G
BP344	2008	SG1	C	T	C	G	A	C	G	C	G	A	G	G	G	G	C	G	G	C	T	G	G	C	G	C	C	C	G	G	A	C	T	T	G	C	T	A	T	G	C	C	C	C	G	G	C	C	G
BP347	2009	SG1	C	T	C	A	A	C	G	C	G	G	G	G	G	G	T	G	G	C	T	G	G	C	G	C	C	C	A	G	A	C	T	T	G	C	T	A	T	G	C	C	T	C	G	G	C	C	A
BP348	2009	SG7	C	T	C	G	A	C	G	C	G	A	G	G	A	G	C	G	G	C	T	G	G	C	G	C	C	C	G	G	A	C	T	T	G	C	T	A	T	G	C	C	C	C	G	A	C	C	G
BP364	2010	SG7	C	T	C	G	A	C	G	C	G	A	G	G	A	G	C	G	G	C	C	G	G	C	G	C	C	C	G	G	A	C	T	T	G	C	T	A	T	G	C	C	C	C	A	A	C	C	G
BP367	2010	SG2	C	T	C	G	A	T	G	C	G	A	G	G	G	G	C	G	G	C	T	G	G	C	G	C	C	C	G	G	A	C	T	T	G	C	T	A	T	G	C	C	C	C	G	A	C	C	G
BP376	2011	SG10	C	T	C	G	A	C	G	C	G	A	G	G	A	G	C	G	G	C	T	G	G	C	G	C	C	C	G	G	A	C	T	T	G	C	T	A	T	G	C	C	C	C	G	A	C	C	G
BP377	2011	SG2	C	T	C	G	A	T	G	C	G	A	G	G	G	G	C	G	G	C	T	G	G	C	G	C	C	C	G	G	A	C	T	T	G	C	T	A	T	G	C	C	C	C	G	A	C	C	G
BP379	2011	SG2	C	C	C	G	A	T	G	C	G	A	G	G	G	G	C	G	G	C	T	G	G	C	G	C	C	C	G	G	A	C	T	T	G	C	T	A	T	G	C	C	C	C	G	A	C	C	G
BP399	2011	SG6	C	T	C	G	A	C	G	C	G	A	G	G	A	G	C	G	G	C	T	G	G	C	G	C	C	C	G	G	A	C	T	T	G	C	T	A	T	G	C	C	C	C	G	A	C	C	G
BP404	2011	SG2	C	C	C	G	A	T	G	C	G	A	G	G	G	G	C	G	G	C	T	G	G	C	G	C	C	C	G	G	A	C	T	T	G	C	T	G	T	G	C	C	C	C	G	A	C	C	G
BP409	2012	SG7	C	T	C	G	A	C	G	C	G	A	G	G	A	G	C	G	G	C	T	G	G	C	G	C	C	C	G	G	A	C	T	T	G	C	T	A	T	G	C	C	C	C	G	A	C	C	G
BP413	2012	SG6	C	T	C	G	A	C	G	C	G	A	G	G	A	G	C	G	G	C	T	G	G	C	G	C	C	C	G	G	A	C	T	T	G	C	T	A	T	G	C	C	C	C	G	A	C	C	G
BP414	2012	SG7	C	T	C	G	A	C	G	C	G	A	G	G	A	G	C	G	G	C	T	G	G	C	G	C	C	C	G	G	A	C	T	T	G	C	T	A	T	G	C	C	C	C	G	A	C	C	G
BP420	2012	SG1	C	T	C	G	A	C	G	C	G	A	G	G	A	G	C	G	G	C	T	G	G	T	G	C	C	C	G	G	A	C	T	T	G	C	T	A	T	G	C	C	C	C	G	A	C	C	G
BP430	2011	SG6	T	T	C	G	A	C	G	C	G	A	G	G	A	G	C	G	G	C	T	G	G	C	G	C	C	C	G	G	A	C	T	T	G	C	T	A	T	G	C	C	C	C	G	A	C	C	G
BP443	2012	SG10	C	T	C	G	A	C	G	C	G	A	G	G	A	G	C	G	G	C	T	G	G	C	G	C	C	C	G	G	A	C	T	T	G	C	T	A	T	G	C	C	C	C	G	A	C	C	G
BP445	2012	SG10	C	T	C	G	A	C	G	C	G	A	G	G	A	G	C	G	G	C	T	G	G	C	G	C	C	C	G	G	A	A	T	T	G	C	T	A	T	G	C	C	C	C	G	A	C	C	G
BP454	2012	SG1	C	T	C	G	A	C	G	C	A	A	G	G	G	G	C	G	G	C	T	G	G	C	G	C	C	C	G	G	A	C	T	T	G	C	T	A	T	G	C	C	C	C	G	G	C	C	G
BP462	2010	SG1	C	T	C	G	A	C	G	C	G	A	G	G	G	G	C	G	G	C	T	G	G	C	G	C	C	C	G	A	A	C	C	T	G	C	T	A	T	G	C	T	C	C	G	A	C	C	G
BP473	2013	SG10	C	T	C	G	A	C	G	C	G	A	G	G	A	G	C	G	G	C	T	G	G	C	G	C	C	C	G	G	A	C	T	T	G	C	T	A	T	G	C	C	C	C	G	A	C	C	G
BP479	2013	SG6	T	T	C	G	A	C	G	C	G	A	G	G	A	G	C	G	G	C	T	G	G	C	G	C	C	C	G	G	A	C	T	T	G	C	T	A	T	G	C	C	C	C	G	A	C	C	G
BP482	2013	SG5	C	T	C	G	A	C	G	C	G	A	G	G	A	G	C	G	G	C	T	G	G	C	G	C	C	C	G	G	A	C	T	T	G	C	T	A	T	A	C	C	C	C	G	A	C	C	G
BP486	2014	SG10	C	T	C	G	A	C	G	C	G	A	G	G	A	G	C	G	G	C	T	G	G	C	G	C	C	C	G	G	A	C	T	T	G	C	T	A	T	G	C	C	C	C	G	A	C	C	G
BP490	2014	SG1	C	T	C	G	A	C	G	C	G	A	G	G	G	A	C	G	G	C	T	A	G	C	G	C	C	C	G	G	A	C	T	T	G	C	T	A	T	G	C	C	C	C	G	G	T	C	G
BP502	2014	SG7	C	T	C	G	A	C	A	C	G	A	G	G	A	G	C	G	G	C	T	G	G	C	G	C	C	C	G	G	A	C	T	T	G	C	T	A	T	G	C	C	C	C	A	A	C	C	G
BP504	2014	SG7	C	T	C	G	G	C	G	C	G	A	G	A	A	G	C	G	G	C	T	G	G	C	G	C	C	C	G	G	A	C	T	T	G	C	T	A	T	G	C	C	C	C	G	A	C	C	G
BP542	2016	SG8	C	T	C	G	A	C	G	C	G	A	G	G	A	G	C	G	G	C	T	G	G	C	G	C	T	C	G	G	A	C	T	T	G	C	C	A	C	G	C	C	C	C	G	A	C	C	G
BP545	2016	SG7	C	T	C	G	A	C	G	C	G	A	G	G	A	G	C	G	G	C	T	G	G	C	G	C	C	C	G	G	A	C	T	T	G	C	T	A	T	G	C	C	C	T	G	A	C	C	G
BP551	2015	SG10	C	T	C	G	A	C	G	C	G	A	G	G	A	G	C	G	A	C	T	G	G	C	G	C	C	C	G	G	A	C	T	T	G	C	T	A	T	G	C	C	C	C	G	A	C	C	G
BP556	2016	SG7	C	T	C	G	A	C	G	C	G	A	G	G	A	G	C	G	G	G	T	G	G	C	G	C	C	C	G	G	A	C	T	T	G	C	T	A	T	G	C	C	C	C	G	A	C	C	G
BP563	2016	SG5	C	T	C	G	A	C	G	C	G	A	G	G	A	G	C	G	G	C	T	G	G	C	G	C	C	C	G	G	A	C	T	T	G	C	T	A	T	A	C	C	C	C	G	A	C	C	G
BP575	2016	SG8	C	T	C	G	A	C	G	C	G	A	G	G	A	G	C	G	G	C	T	G	G	C	G	C	T	C	G	G	A	C	T	T	G	C	C	A	C	G	C	C	C	C	G	A	C	C	G
BP576	2016	SG5	C	T	C	G	A	C	G	C	G	A	G	G	A	G	C	G	G	C	T	G	G	C	G	C	C	C	G	G	A	C	T	T	G	C	T	A	T	A	C	C	C	C	G	A	C	C	G
BP577	2017	SG7	C	T	C	G	A	C	G	C	G	A	G	G	A	G	C	T	G	C	T	G	G	C	G	C	C	C	G	G	A	C	T	T	G	C	T	A	T	G	C	C	C	C	G	A	C	C	G
BP580	2015	SG5	C	T	C	G	A	C	G	C	G	A	G	G	A	G	C	G	G	C	T	G	G	C	G	C	C	A	G	G	A	C	T	T	G	C	T	A	T	A	C	C	C	C	G	A	C	C	G
*Of 20 SNP targets used for SBE-based SNP genotyping, one (position 3758827) was not identified by CSI Phylogeny 1.4. The reason is unclear.
[truncated: 207 more columns]

## Sheet: Table S4
Table S4. SNP genotypes of Japanese Bordetella pertussis non-MT27 isolates collected during 2005-2019.
MLVA type	No. of isolates tested	Isolation year	No. of isolates with the SNP genotype
			SG1	SG3	SG7	SG10
MT22	2	2005 & 2009	2
MT25	2	2018		1	1
MT26	2	2005 & 2012	2
MT28	4	2013-2016			3	1
MT29	2	2014-2015	2
MT31	1	2015	1
MT32	1	2015	1
MT34	2	2009 & 2016	2
MT36	4	2018			4
MT69	2	2005-2006	2
MT78	1	2015		1
MT95	1	2007	1
MT96	1	2015			1
MT157	1	2019	1
MT186	57	2004-2016	57
MT187	3	2006-2011	3
MT194	4	2006	4
MT221	1	2010	1
MT224	2	2005 & 2013	2
MT225	1	2011	1
MT226	2	2005	2
MT229	1	2007	1
MT234	2	2007	2
MT252	1	2011	1
MT311	1	2009	1
MT314	1	2011	1
MT316	2	2011-2012	2
Total no.	104		92	2	9	1

## Sheet: Table S5
Table S5. SNP genotypes of Taiwanese Bordetella pertussis isolates.
Isolate	Isolation year	MLVA type	MT group	SNP genotype
BP9901	2010	27	MT27	SG11
BP9906	2010	27	MT27	SG1
BP9907	2010	27	MT27	SG1
BP9910	2010	27	MT27	SG1
BP9911	2010	27	MT27	SG1
BP10002	2011	Novel type	non-MT27	SG1
BP10004	2011	27	MT27	SG1
BP10012	2011	27	MT27	SG3
BP10015	2011	104	non-MT27	SG1
BP10020	2011	27	MT27	SG1
BP10022	2011	27	MT27	SG11
BP10044	2011	36	non-MT27	SG11
BP10046	2011	27	MT27	SG7
BP10047	2011	26	non-MT27	SG3
BP10104	2012	16	non-MT27	SG1
BP10120	2012	104	non-MT27	SG1
BP10023	2012	27	MT27	SG1
BP10027	2012	25	non-MT27	SG7
BP10202	2013	27	MT27	SG11
BP10204	2013	27	MT27	SG11
BP10206	2013	27	MT27	SG7
BP10213	2013	116	non-MT27	SG1
BP10304	2014	27	MT27	SG5
BP10309	2014	158	non-MT27	SG1
BP10315	2014	27	MT27	SG3
BP10319	2014	27	MT27	SG3
BP10327	2014	27	MT27	SG11
BP10402	2015	158	non-MT27	SG11
BP10404	2015	27	MT27	SG11
BP10409	2015	34	non-MT27	SG1
BP10412	2015	27	MT27	SG11
BP10419	2015	27	MT27	SG1
BP10423	2015	18	non-MT27	SG3
BP10501	2016	26	non-MT27	SG3
BP10503	2016	27	MT27	SG1
BP10504	2016	27	MT27	SG3
BP10506	2016	28	non-MT27	SG3
BP10602	2017	32	non-MT27	SG7
BP10607	2017	27	MT27	SG1
BP10611	2017	29	non-MT27	SG1
BP10616	2017	26	non-MT27	SG3
BP10702	2018	27	MT27	SG1
BP10704	2018	27	MT27	SG1
BP10711	2018	27	MT27	SG1
BP10713	2018	27	MT27	SG1
BP10718	2018	25	non-MT27	SG7
BP10720	2018	27	MT27	SG1
BP10804	2019	27	MT27	SG7

## Sheet: Table S6
Table S6. Application of SNP genotyping to clinical specimens collected from 20 pertussis patients.
Sample ID	SNP name																				SNP genotype
	SNP2	SNP8	SNP11	SNP12	SNP14	SNP15	SNP16	SNP17	SNP18	SNP19	SNP20	SNP22	SNP24	SNP25	SNP26	SNP28	SNP30	SNP31	SNP32	SNP34
2383	C	G	A	A	A	T	C	G	C	C	C	G	G	C	A	T	G	C	T	G	SG3
2397	C	G	A	A	A	T	C	G	C	C	C	G	G	C	A	T	G	C	T	G	SG3
2414	C	G	A	A	A	C	C	G	C	C	C	G	G	C	A	T	G	C	C	G	SG1
2423	C	G	A	A	A	C	C	G	C	C	C	G	G	C	A	T	G	C	C	G	SG2
2445	C	G	A	A	A	C	C	G	C	C	C	G	G	C	A	T	G	C	C	G	SG3
2470	C	G	A	A	A	T	C	G	C	C	C	G	G	C	A	T	G	C	ND	G	unknown
2485	C	G	A	A	A	T	C	G	C	C	C	G	G	C	A	T	G	T	T	G	SG4
2501	C	G	A	A	A	C	C	G	C	C	C	G	G	C	A	T	G	C	C	G	SG1
2502	C	G	A	A	A	T	C	G	C	C	C	G	G	C	A	T	G	C	ND	ND	unknown
2553	C	G	A	A	A	C	C	G	C	C	C	G	G	C	A	T	G	C	C	G	SG1
2676	C	G	A	A	A	T	C	G	C	C	C	G	G	C	A	T	G	C	ND	G	unknown
2589	C	G	A	A	A	C	C	G	C	C	C	G	G	C	A	T	G	C	C	G	SG1
2603	C	G	A	A	A	T	C	G	C	C	C	G	G	C	A	T	G	C	T	G	SG3
2611	C	G	A	A	A	T	C	G	C	C	C	G	G	C	A	T	G	C	ND	ND	unknown
2613	C	G	A	A	A	T	C	G	C	C	C	G	G	C	A	T	G	C	ND	G	unknown
2621	C	G	A	A	A	T	C	G	C	C	C	G	G	C	A	T	G	C	T	G	SG3
2633	C	G	A	A	A	T	C	G	C	C	C	G	G	C	A	T	G	C	T	G	SG3
2646	C	G	A	A	A	T	C	G	C	C	C	G	G	C	A	T	G	C	T	G	SG3
2653	C	G	A	A	A	T	C	G	C	C	C	ND	G	C	A	T	G	C	ND	ND	unknown
2663	C	G	A	A	A	T	C	G	C	C	C	G	G	C	A	T	G	C	ND	G	unknown
ND, not determined
